# Supplementary material
Source: publisher figshare collection journal article supplement (https://diabetesjournals.figshare.com/articles/dataset/_/12985481)
Supplement: Supplementary file 1 [file 2]

**Supplemental Table 1. Baseline characteristics of participants by geographic regions and diabetes status**

|                                              | North America/Europe |                  | South America |                  | Africa         |                  | Middle East   |                  | South Asia     |                   | South East Asia |                  | China         |                 |
|----------------------------------------------|----------------------|------------------|---------------|------------------|----------------|------------------|---------------|------------------|----------------|-------------------|-----------------|------------------|---------------|-----------------|
|                                              | No DM                | Prevalent DM     | No DM         | Prevalent DM     | No DM          | Prevalent DM     | No DM         | Prevalent DM     | No DM          | Prevalent DM      | No DM           | Prevalent DM     | No DM         | Prevalent DM    |
| Age <sup>a</sup>                             | 52 (9.2)             | 55.8 (8.6) **    | 50.7 (9.7)    | 54.9 (8.9) **    | 49.5 (10.6)    | 54.3 (9.9) **    | 46.5 (8.9)    | 52.2 (9) **      | 47.5 (10.2)    | 52.0 (9.8) **     | 51.1 (9.9)      | 56.2 (8.9) **    | 50.2 (9.8)    | 55.9 (8.5) **   |
| Men <sup>b</sup>                             | 7102 (42.6)          | 836 (44.7)       | 7780 (38.4)   | 892 (38.3)       | 1710 (30.9)    | 75 (20.1) **     | 3764 (48.7)   | 921 (43.3) **    | 11290 (43.3)   | 2029 (46.7) **    | 4534 (38.1)     | 808 (39.5)       | 16594 (41.8)  | 1012 (40.4)     |
| Duration of follow up <sup>c</sup>           | 9.0 (8.1-9.3)        | 8.8 (7.9-9.1) ** | 8.9 (6.8-9.6) | 8.9 (7.5-9.7) ** | 6.8 (3.8-10.0) | 5.8 (3.7-8.0) ** | 7.0 (3.4-8.9) | 7.1 (3.4-9.2) ** | 9.9 (7.3-12.2) | 9.3 (7.2-11.8) ** | 6.9 (3.0-8.8)   | 7.9 (3.3-8.9) ** | 9.1 (6.9-9.9) | 9.1 (7.0-9.9)   |
| Systolic blood pressure (mmHg) <sup>a</sup>  | 130.4 (20.4)         | 139.6 (21.6) **  | 130.8 (22.5)  | 139.5 (22.8) **  | 137.1 (26.4)   | 146.7 (30.9) **  | 123.2 (18.3)  | 132.1 (20.7) **  | 124.1 (20.6)   | 134.6 (21.8) **   | 136.1 (28.7)    | 142.6 (25.2) **  | 132.4 (22.1)  | 140.7 (22.6) ** |
| Diastolic blood pressure (mmHg) <sup>a</sup> | 81.6 (12.5)          | 84.3 (12.5) **   | 82.6 (23.8)   | 85.6 (17.9) **   | 86.4 (15.5)    | 90.8 (18.6) **   | 77.5 (11.1)   | 81 (11.7) **     | 79.6 (12.7)    | 83 (13) **        | 80.9 (16.2)     | 82.1 (12.1) *    | 82.5 (13.3)   | 84.7 (12.1) **  |
| BMI (kg/m <sup>2</sup> ) <sup>a</sup>        | 27.5 (5.1)           | 32.1 (5.8) **    | 27.8 (5.3)    | 31.3 (5.8) **    | 26.2 (7.1)     | 30.3 (7.9) **    | 28.2 (5.4)    | 30.6 (5.4) **    | 22.8 (4.7)     | 25.3 (4.4) **     | 25.4 (4.8)      | 27.3 (5.1) **    | 24.4 (3.6)    | 25.8 (3.6) **   |
| Waist (cms) <sup>a</sup>                     | 88.9 (13.4)          | 101.5 (13.8) **  | 91 (13)       | 100.2 (13.2) **  | 82.8 (14.1)    | 93.8 (17.3) **   | 90.1 (12.7)   | 97.6 (12.3) **   | 77 (13.3)      | 85.5 (11.6) **    | 84.3 (11.9)     | 91.1 (12.2) **   | 80.5 (10.4)   | 86.1 (10) **    |
| Waist-to-hip ratio <sup>a</sup>              | 0.87 (0.09)          | 0.92 (0.09) **   | 0.89 (0.08)   | 0.94 (0.08) **   | 0.85 (0.09)    | 0.89 (0.09) **   | 0.89 (0.08)   | 0.95 (0.08) **   | 0.86 (0.09)    | 0.91 (0.09) **    | 0.87 (0.08)     | 0.91 (0.08) **   | 0.86 (0.07)   | 0.89 (0.06) **  |
| Cholesterol (mmol/L) <sup>a</sup>            | 5.3 (1)              | 5.1 (1.2) **     | 5.2 (1)       | 5.2 (1.1)        | 4.3 (1.1)      | 4.4 (1.1)        | 4.9 (1)       | 5 (1) *          | 4.5 (1)        | 4.8 (1) **        | 5.4 (1.1)       | 5.6 (1.1) **     | 4.6 (0.9)     | 4.8 (0.9) **    |
| Triglycerides (mmol/L) <sup>a</sup>          | 1.3 (0.8)            | 1.9 (1.1) **     | 1.8 (1.3)     | 2.4 (1.6) **     | 1.2 (0.8)      | 1.5 (1.1) **     | 1.6 (1)       | 2 (1.3) **       | 1.4 (0.9)      | 1.6 (1) **        | 1.6 (0.9)       | 2.1 (1.3) **     | 1.4 (1)       | 1.8 (1.3) **    |
| HDL Cholesterol (mmol/L) <sup>a</sup>        | 1.4 (0.4)            | 1.2 (0.3) **     | 1.2 (0.3)     | 1.1 (0.3) **     | 1.2 (0.4)      | 1.1 (0.4) *      | 1.1 (0.3)     | 1.1 (0.3) **     | 1.2 (0.4)      | 1.2 (0.3)         | 1.2 (0.3)       | 1.2 (0.3) **     | 1.2 (0.3)     | 1.2 (0.3) *     |
| LDL Cholesterol (mmol/L) <sup>a</sup>        | 3.3 (0.9)            | 3.1 (1) **       | 3.3 (0.9)     | 3.2 (0.9)        | 2.6 (0.9)      | 2.7 (0.9)        | 3.1 (0.8)     | 3.1 (0.9)        | 3.1 (1.2)      | 3.4 (1.2) **      | 3.5 (1)         | 3.5 (1.1)        | 2.7 (0.8)     | 2.9 (0.8) **    |
| Total Cholesterol to HDL ratio <sup>a</sup>  | 4.1 (1.3)            | 4.5 (1.5) **     | 4.5 (1.3)     | 4.9 (1.4) **     | 3.8 (1.4)      | 4.2 (1.4) *      | 4.7 (1.4)     | 4.9 (1.5) **     | 4.2 (1.3)      | 4.4 (1.4) **      | 4.7 (1.4)       | 5 (1.5) **       | 4 (1)         | 4.3 (1.3) **    |
| Current use of tobacco <sup>b</sup>          | 2935 (17.6)          | 336 (18)         | 4313 (21.3)   | 401 (17.3) **    | 1351 (24.9)    | 55 (15) **       | 1196 (15.5)   | 220 (10.3) **    | 6398 (24.6)    | 691 (15.9) **     | 1854 (15.7)     | 246 (12.2) **    | 9133 (23.3)   | 472 (19) **     |
| Current use of alcohol <sup>b</sup>          | 11240 (67.5)         | 872 (46.6) **    | 9067 (44.7)   | 895 (38.5) **    | 1373 (25)      | 54 (14.6) **     | 39 (0.6)      | 7 (0.4)          | 2338 (9)       | 452 (10.4) **     | 1694 (14.2)     | 132 (6.5) **     | 8720 (22.1)   | 393 (15.8) **   |
| On glucose lowering agent <sup>bd</sup>      | 0 (0)                | 807 (68.8)       | 0 (0)         | 958 (62.6)       | 0 (0)          | 87 (31.5)        | 0 (0)         | 1061 (71.5)      | 0 (0)          | 806 (29.1)        | 0 (0)           | 638 (36.5)       | 0 (0)         | 980 (60.8)      |
| On oral hypo glycemic agent <sup>bd</sup>    | 0 (0)                | 734 (62.6)       | 0 (0)         | 893 (58.3)       | 0 (0)          | 81 (29.3)        | 0 (0)         | 998 (67.3)       | 0 (0)          | 748 (27)          | 0 (0)           | 621 (35.5)       | 0 (0)         | 907 (56.3)      |
| Insulin <sup>bd</sup>                        | 0 (0)                | 142 (12.1)       | 0 (0)         | 125 (8.2)        | 0 (0)          | 10 (3.6)         | 0 (0)         | 140 (9.4)        | 0 (0)          | 79 (2.9)          | 0 (0)           | 27 (1.5)         | 0 (0)         | 105 (6.5)       |
| On Bp lowering medication <sup>b</sup>       | 2560 (15.4)          | 897 (48) **      | 4121 (20.3)   | 1081 (46.5) **   | 559 (10.1)     | 103 (27.5) **    | 854 (11.1)    | 660 (31) **      | 818 (3.1)      | 433 (10) **       | 1123 (9.4)      | 505 (24.7) **    | 3799 (9.6)    | 644 (25.7) **   |
| On Cholesterol lowering drug <sup>b</sup>    | 1337 (8)             | 665 (35.6) **    | 921 (4.5)     | 345 (14.8) **    | 34 (0.6)       | 19 (5.1) **      | 322 (4.2)     | 611 (28.7) **    | 124 (0.5)      | 92 (2.1) **       | 416 (3.5)       | 354 (17.3) **    | 400 (1)       | 103 (4.1) **    |
| On Aspirin <sup>b</sup>                      | 1026 (6.2)           | 362 (19.4) **    | 789 (3.9)     | 296 (12.7) **    | 337 (6.1)      | 28 (7.5)         | 240 (3.1)     | 378 (17.8) **    | 85 (0.3)       | 58 (1.3) **       | 43 (0.4)        | 50 (2.4) **      | 435 (1.1)     | 78 (3.1) **     |

DM, self reported diabetes taking antidiabetic medications or fasting glucose  $\geq 7.0$  mmol/L; non-DM, Not on diabetic medication and fasting glucose  $< 7$  mmol/L.

<sup>a</sup> Values are presented as mean (standard deviation); <sup>b</sup> Values are presented as number (percent); <sup>c</sup> Values are presented as median (Interquartile range); <sup>d</sup> percentage calculated for the self-reported diabetes individuals, North America/Europe (n=1,173), South America (n=1,531), Africa (n=276), Middle East (n=1,484), South Asia (n=2,767), South East Asia (n=1,747) and China (n=1,611); \*p<0.05 and \*\*p<0.001 compared to non-diabetic individuals; p<0.001 for all comparisons between the income country groups in both those with diabetes and no diabetes.

**Supplemental Table 2. Age and sex adjusted event rates (per 1000 person years) among diabetes (Physician diagnosed on medication, not on medication and newly-diagnosed) and by country income categories**

| Risk factor                | High-income countries                          |                                                    |                          | Middle-income countries                        |                                                    |                          | Low-income countries                           |                                                    |                          |
|----------------------------|------------------------------------------------|----------------------------------------------------|--------------------------|------------------------------------------------|----------------------------------------------------|--------------------------|------------------------------------------------|----------------------------------------------------|--------------------------|
|                            | Physician diagnosed on antidiabetic medication | Physician diagnosed not on antidiabetic medication | Newly diagnosed diabetes | Physician diagnosed on antidiabetic medication | Physician diagnosed not on antidiabetic medication | Newly diagnosed diabetes | Physician diagnosed on antidiabetic medication | Physician diagnosed not on antidiabetic medication | Newly diagnosed diabetes |
| <b>n</b>                   | 1,032                                          | 404                                                | 519                      | 3,484                                          | 2,805                                              | 2,872                    | 821                                            | 2,043                                              | 1,612                    |
| <b>Major CVD</b>           | 11.6 (9-14.2)                                  | 5.3 (2.6-7.9)                                      | 5.5 (3.4-7.7)            | 10.8 (9.3-12.3)                                | 9.1 (7.7-10.4)                                     | 8.0 (6.9-9.1)            | 13.8 (10.2-17.5)                               | 12.4 (10.6-14.1)                                   | 6.4 (5.2-7.7)            |
| <b>All-cause mortality</b> | 5.0 (3.6-6.4)                                  | 4.9 (2.5-7.3)                                      | 2.1 (0.8-3.3)            | 9.8 (8.1-11.5)                                 | 10.1 (8.6-11.6)                                    | 2.9 (2.2-3.6)            | 21.0 (16.3-25.7)                               | 17.4 (15.4-19.4)                                   | 7.9 (6.1-9.6)            |
| <b>CV mortality</b>        | 1.4 (0.6-2.1)                                  | 1.3 (0-2.8)                                        | 0 (0-0)                  | 3.5 (2.5-4.5)                                  | 2.6 (1.9-3.3)                                      | 0.7 (0.4-1)              | 8.7 (5.5-11.8)                                 | 7.4 (6.2-8.6)                                      | 2.3 (1.6-3.1)            |

Values are presented as age and sex adjusted event rates per 1,000 person years (95% Confidence Interval)

**Supplemental Table 3. Hazards Ratios for all-cause and CV mortality among those with and without diabetes by geographic regions**

|                                  | n      | North America/Europe | South America   | Africa          | Middle East     | South Asia      | South East Asia | China           |
|----------------------------------|--------|----------------------|-----------------|-----------------|-----------------|-----------------|-----------------|-----------------|
|                                  |        | HR (95% CI)          | HR (95% CI)     | HR (95% CI)     | HR (95% CI)     | HR (95% CI)     | HR (95% CI)     | HR (95% CI)     |
| <b>All-cause mortality n (%)</b> |        | 509(2.7)             | 1093(4.8)       | 658(11.3)       | 152(1.6)        | 3172(10.7)      | 513(4.6)        | 1494(3.5)       |
| Model-1                          | 138563 | 1.27(1.00-1.61)      | 1.67(1.43-1.93) | 1.60(1.23-2.08) | 0.93(0.65-1.32) | 1.20(1.10-1.31) | 1.67(1.38-2.02) | 1.19(0.99-1.42) |
| Model-2                          | 119751 | 1.10(0.85-1.41)      | 1.54(1.31-1.80) | 2.67(1.85-3.85) | 0.95(0.65-1.39) | 1.31(1.18-1.46) | 1.56(1.22-1.99) | 1.18(0.98-1.42) |
| Model-3                          | 119751 | 0.85(0.60-1.21)      | 1.06(0.85-1.33) | 2.80(1.85-4.23) | 0.59(0.32-1.06) | 1.22(1.08-1.36) | 1.45(1.09-1.92) | 1.00(0.78-1.29) |
| <b>CV mortality n (%)</b>        |        | 93(0.5)              | 284(1.3)        | 115(2)          | 55(0.6)         | 960(3.2)        | 145(1.3)        | 474(1.1)        |
| Model-1                          | 138563 | 2.17(1.37-3.44)      | 2.09(1.58-2.75) | 1.51(0.78-2.92) | 0.92(0.51-1.65) | 1.76(1.53-2.04) | 1.52(1.05-2.18) | 1.41(1.04-1.90) |
| Model-2                          | 119751 | 1.87(1.15-3.04)      | 1.68(1.25-2.25) | 2.48(0.80-7.69) | 0.89(0.47-1.66) | 1.72(1.45-2.05) | 1.49(0.93-2.38) | 1.29(0.95-1.76) |
| Model-3                          | 119751 | 1.02(0.49-2.11)      | 1.27(0.85-1.89) | 1.56(0.35-6.99) | 0.29(0.09-0.97) | 1.63(1.36-1.97) | 1.19(0.67-2.09) | 1.01(0.67-1.54) |

Reference group: Individuals without diabetes; Values are presented as Hazards ratio (95% Confidence Interval)

Model-1: Adjusted for age, sex and center (as random effect).

Model-2: Model-1+ behavioural factors (low physical activity level, smoking), BMI and hypertension.

Model-3: Model-2+treatments (BP lowering drugs, cholesterol lowering drugs, glucose lowering agents and aspirin).

**Supplemental Table 4: Hazards Ratios for all-cause and CV mortality by country income level**

|                                  | High-income countries                          |                                                    |                          | Middle-income countries                        |                                                    |                          | Low-income countries                           |                                                    |                          |
|----------------------------------|------------------------------------------------|----------------------------------------------------|--------------------------|------------------------------------------------|----------------------------------------------------|--------------------------|------------------------------------------------|----------------------------------------------------|--------------------------|
|                                  | Physician diagnosed on antidiabetic medication | Physician diagnosed not on antidiabetic medication | Newly diagnosed diabetes | Physician diagnosed on antidiabetic medication | Physician diagnosed not on antidiabetic medication | Newly diagnosed diabetes | Physician diagnosed on antidiabetic medication | Physician diagnosed not on antidiabetic medication | Newly diagnosed diabetes |
|                                  | n=1032                                         | n=404                                              | n=519                    | n=3484                                         | n=2805                                             | n=2872                   | n=821                                          | n=2043                                             | n=1612                   |
| <b>All-cause mortality n (%)</b> | 52(5.1)                                        | 17(4.3)                                            | 11(2.1)                  | 299(9)                                         | 233(8.7)                                           | 76(2.6)                  | 168(20.5)                                      | 388(19.2)                                          | 114(7.1)                 |
| Model-1                          | 1.67(1.21-2.30)                                | 1.83(1.12-3.00)                                    | 0.65(0.35-1.20)          | 1.89(1.68-2.14)                                | 1.78(1.54-2.04)                                    | 0.57(0.45-0.72)          | 1.67(1.40-1.98)                                | 1.69(1.44-1.98)                                    | 0.59(0.45-0.78)          |
| Model-2                          | 1.55(1.10-2.20)                                | 1.39(0.81-2.41)                                    | 0.58(0.31-1.11)          | 1.86(1.63-2.12)                                | 1.70(1.45-1.99)                                    | 0.47(0.35-0.61)          | 1.93(1.56-2.38)                                | 1.80(1.48-2.19)                                    | 0.66(0.47-0.92)          |
| Model-3                          | 1.44(0.99-2.08)                                | 1.32(0.76-2.28)                                    | 0.56(0.29-1.07)          | 1.84(1.61-2.11)                                | 1.70(1.45-2.00)                                    | 0.47(0.35-0.61)          | 2.04(1.64-2.53)                                | 1.84(1.51-2.24)                                    | 0.65(0.47-0.92)          |
| <b>CV mortality n (%)</b>        | 14(1.4)                                        | 4(1)                                               | 0(0)                     | 106(3.2)                                       | 64(2.4)                                            | 19(0.7)                  | 71(8.7)                                        | 177(8.8)                                           | 37(2.3)                  |
| Model-1                          | 2.32(1.18-4.58)                                | 2.82(1.00-7.96)                                    | 0.00(0.00-0.00)          | 2.47(2.01-3.04)                                | 1.74(1.33-2.28)                                    | 0.51(0.31-0.82)          | 2.29(1.74-3.01)                                | 2.65(2.11-3.33)                                    | 0.58(0.35-0.96)          |
| Model-2                          | 2.00(0.97-4.15)                                | 1.82(0.62-5.30)                                    | 0.00(0.00-0.00)          | 2.20(1.76-2.75)                                | 1.67(1.24-2.25)                                    | 0.35(0.20-0.62)          | 2.39(1.69-3.37)                                | 2.36(1.75-3.19)                                    | 0.53(0.27-1.03)          |
| Model-3                          | 1.80(0.82-3.95)                                | 1.81(0.62-5.29)                                    | 0.00(0.00-0.00)          | 2.05(1.62-2.58)                                | 1.63(1.21-2.20)                                    | 0.35(0.19-0.61)          | 2.49(1.74-3.56)                                | 2.39(1.76-3.23)                                    | 0.52(0.27-1.02)          |

Reference group: Individuals without diabetes; Values are presented as HR, Hazards ratio (95% Confidence Interval)

Model-1: Adjusted for age, sex, ethnicity and center (as random effect).

Model-2: Model-1+ behavioural factors (physical activity level, smoking), BMI and hypertension.

Model-3: Model-2+treatments (BP lowering drugs, cholesterol lowering drugs and aspirin).

**Supplemental Table 5: Hazards Ratios for All-cause and CV Mortality by tertiles of individual's wealth index and country income categories**

|                                  | N      | High-income countries |                        |                     | Middle-income countries |                        |                     | Low-income countries |                        |                     |
|----------------------------------|--------|-----------------------|------------------------|---------------------|-------------------------|------------------------|---------------------|----------------------|------------------------|---------------------|
|                                  |        | Tertiles-3<br>(High)  | Tertiles-2<br>(Middle) | Tertiles-1<br>(Low) | Tertiles-3<br>(High)    | Tertiles-2<br>(Middle) | Tertiles-1<br>(Low) | Tertiles-3<br>(High) | Tertiles-2<br>(Middle) | Tertiles-1<br>(Low) |
| <b>All-cause mortality n (%)</b> |        | 128 (2.2)             | 119 (2)                | 146 (3.3)           | 902 (3)                 | 1187 (3.9)             | 1681 (5.6)          | 687 (6.5)            | 1002 (10.8)            | 1460 (14.7)         |
| Model-1                          | 121103 | 1.54(0.99-2.41)       | 1.22(0.72-2.08)        | 1.52(1.02-2.27)     | 1.72(1.46-2.03)         | 1.39(1.18-1.63)        | 1.45(1.25-1.68)     | 1.41(1.18-1.69)      | 1.35(1.11-1.65)        | 1.71(1.16-2.53)     |
| Model-2                          | 105711 | 1.60(0.98-2.60)       | 1.03(0.58-1.85)        | 1.21(0.78-1.89)     | 1.71(1.42-2.05)         | 1.19(0.98-1.43)        | 1.42(1.21-1.67)     | 1.53(1.24-1.88)      | 1.33(1.04-1.71)        | 2.43(1.49-3.96)     |
| Model-3                          | 105711 | 0.86(0.41-1.78)       | 0.72(0.31-1.68)        | 1.10(0.60-2.01)     | 1.41(1.11-1.79)         | 0.83(0.64-1.08)        | 1.15(0.93-1.43)     | 1.26(0.98-1.62)      | 1.22(0.91-1.62)        | 2.17(1.28-3.69)     |
| <b>CV mortality n (%)</b>        |        | 23 (0.4)              | 9 (0.2)                | 27 (0.6)            | 241 (0.8)               | 328 (1.1)              | 484 (1.6)           | 248 (2.4)            | 336 (3.6)              | 343 (3.4)           |
| Model-1                          | 121103 | 2.52(1.01-6.32)       | 4.55(1.09-19.1)        | 0.84(0.28-2.46)     | 2.02(1.48-2.75)         | 1.56(1.16-2.08)        | 1.61(1.23-2.10)     | 2.00(1.50-2.66)      | 1.94(1.44-2.61)        | 2.16(1.10-4.24)     |
| Model-2                          | 105711 | 3.35(1.18-9.50)       | 4.27(0.88-20.8)        | 0.44(0.14-1.37)     | 2.00(1.43-2.80)         | 1.24(0.88-1.75)        | 1.52(1.14-2.01)     | 1.94(1.39-2.71)      | 1.58(1.06-2.36)        | 2.78(1.12-6.88)     |
| Model-3                          | 105711 | 1.07(0.20-5.82)       | 2.15(0.21-21.5)        | 0.52(0.12-2.20)     | 1.39(0.87-2.21)         | 0.79(0.48-1.29)        | 1.10(0.75-1.62)     | 1.62(1.09-2.42)      | 1.40(0.88-2.22)        | 2.54(0.96-6.68)     |

Reference group: Individuals without diabetes; Values are presented as HR, Hazards ratio (95% Confidence Interval)

Model-1: Adjusted for age, sex, ethnicity and center (as random effect).

Model-2: Model-1+ behavioural factors (physical activity level, smoking), BMI and hypertension.

Model-3: Model-2+treatments (BP lowering drugs, cholesterol lowering drugs, glucose lowering agents and aspirin).
